# Supplementary material for: Designing rare earth free permanent magnets: insights from small Co clusters
Source: Royal Society of Chemistry journal article supplement (doi:10.1039/c9cp04553h), 2019-01-01
Supplement: c9cp04553h1.pdf [file c9cp04553h1.pdf]

## Supplementary Information

### Designing rare earth free permanent magnets: Insights from small Co clusters

Arpita Sen and Prasenjit Sen

*Harish-Chandra Research Institute, HBNI,  
Chhatnag Road, Jhansi, Allahabad 211019, India.*

TABLE I: Spin moment ( $\mu_B$ ), point group (PG) symmetry, and MAE's (K) calculated by two different methods of  $\text{Co}_4\text{A}_2$  clusters. Clusters are identified by their relative energies (see Figure 2 in main text). Non-SC means charge density was kept constant while spin-orbit coupling is included. MAE SC means, charge density is varied to achieve self-consistency.

| Relative energy                            | $M_s$ | PG symmetry | MAE (Non SC) | MAE (SC) |
|--------------------------------------------|-------|-------------|--------------|----------|
| <b><math>\text{Co}_4\text{C}_2</math></b>  |       |             |              |          |
| 0.0                                        | 4     | $C_s$       | 24.64        | 24.10    |
| 0.220                                      | 4     | $C_s$       | 12.13        | 13.25    |
| 0.230                                      | 2     | $C_s$       | 28.41        | 25.32    |
| 0.243                                      | 4     | $C_2$       | 28.08        | 26.94    |
| 0.448                                      | 0     | $C_s$       | 48.34        |          |
| <b><math>\text{Co}_4\text{Si}_2</math></b> |       |             |              |          |
| 0.0                                        | 6     | $D_{2h}$    | 49.92        | 48.71    |
| 0.106                                      | 6     | $D_{4h}$    | 35.12        | 34.55    |
| 0.439                                      | 4     | $D_{4h}$    | 42.25        | 41.31    |
| <b><math>\text{Co}_4\text{Ge}_2</math></b> |       |             |              |          |
| 0.0                                        | 6     | $D_{4h}$    | 33.87        | 34.08    |
| 0.354                                      | 6     | $C_s$       | 69.41        | 66.89    |
| 0.472                                      | 6     | $C_{2v}$    | 62.58        | 61.84    |
| <b><math>\text{Co}_4\text{N}_2</math></b>  |       |             |              |          |
| 0.0                                        | 8     | $C_s$       | 28.18        | 27.61    |
| 0.139                                      | 6     | $C_{2v}$    | 48.62        |          |
| 0.248                                      | 8     | $C_s$       | 51.92        | 54.38    |
| 0.280                                      | 8     | $C_s$       | 31.11        |          |
| 0.404                                      | 8     | $C_{2v}$    | 17.37        | 16.81    |
| 0.449                                      | 6     | $C_{2v}$    | 60.67        | 56.51    |
| <b><math>\text{Co}_4\text{P}_2</math></b>  |       |             |              |          |
| 0.0                                        | 6     | $C_{2v}$    | 35.12        | 31.84    |
| 0.041                                      | 8     | $C_{2v}$    | 5.57         |          |
| 0.082                                      | 6     | $C_1$       | 26.13        | 24.96    |
| 0.110                                      | 6     | $D_{4h}$    | 19.41        | 21.05    |
| 0.198                                      | 8     | $C_s$       | 44.47        | 39.71    |
| 0.450                                      | 0     | $C_{2v}$    | 17.50        | 16.87    |
| 0.459                                      | 4     | $C_s$       | 29.14        | 30.97    |
| <b><math>\text{Co}_4\text{As}_2</math></b> |       |             |              |          |
| 0.0                                        | 8     | $D_{4h}$    | 50.14        | 41.80    |
| 0.034                                      | 8     | $C_{2v}$    | 16.28        | 13.53    |
| 0.142                                      | 6     | $C_{2v}$    | 39.32        |          |
| 0.244                                      | 8     | $C_s$       | 70.36        | 75.34    |
| 0.485                                      | 2     | $C_s$       | 38.59        | 33.42    |
